# Supplementary material for: Suppression of Pyruvate Dehydrogenase Kinase by Dichloroacetate in Cancer and Skeletal Muscle Cells Is Isoform Specific and Partially Independent of HIF-1α
Source: MDPI journal article supplement (doi:10.3390/ijms22168610), 2021-08-10

## Supplementary materials S1-S4

### Suppression of pyruvate dehydrogenase kinase by dichloroacetate in cancer and skeletal muscle cells is isoform-specific and partially independent of HIF-1 $\alpha$

Nives Škorja Milić<sup>1,2</sup>, Klemen Dolinar<sup>1</sup>, Katarina Miš<sup>1</sup>, Urška Matkovič<sup>1,&</sup>, Maruša Bizjak<sup>3,4</sup>, Mojca Pavlin<sup>3,5</sup>, Matej Podbregar<sup>1,6,7</sup>, and Sergej Pirkmajer<sup>1,\*</sup>

<sup>1</sup> Institute of Pathophysiology, Faculty of Medicine, University of Ljubljana, Slovenia

<sup>2</sup> Institute of Anatomy, Faculty of Medicine, University of Ljubljana, Slovenia

<sup>3</sup> Group for nano and biotechnological applications, Faculty of Electrical Engineering, University of Ljubljana, Slovenia

<sup>4</sup> Pharmacy Institute, Faculty of Pharmacy, University of Ljubljana, Ljubljana, Slovenia

<sup>5</sup> Institute of Biophysics, Faculty of Medicine, University of Ljubljana, Ljubljana, Slovenia

<sup>6</sup> Department of Internal Medicine, Faculty of Medicine, University of Ljubljana, Slovenia

<sup>7</sup> Department for Internal Intensive care, General and Teaching Hospital Celje, Celje, Slovenia

\* To whom correspondence should be addressed:  
sergej.pirkmajer@mf.uni-lj.si; Tel.: +386 1 543 7042

& Current address: Department of Experimental Oncology, Institute of Oncology Ljubljana, Ljubljana, Slovenia

## **Supplementary figures S1-S3**

## Supplementary Figure S1

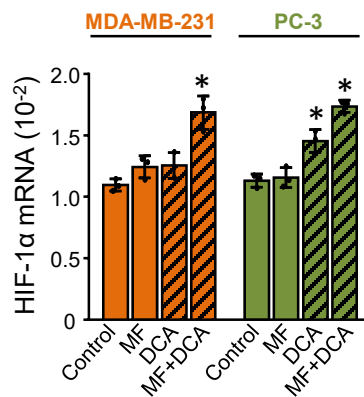

**Supplementary figure S1 (supplementary figure to Figure 5): Inhibition of the mTOR pathway does not contribute to the DCA-induced suppression of PDK1.** MDA-MB-231 and PC-3 cells were treated with 5 mM metformin (MF), 10 mM DCA, or both in serum-free RPMI medium for 24 hours. The mRNA expression of HIF-1 $\alpha$  was measured with qPCR (endogenous control: cyclophilin). Results are means  $\pm$  SD of one experiment performed in triplicate for each cell line ( $n = 3$ ). \*  $p < 0.05$  vs. Control.

## Supplementary Figure S2

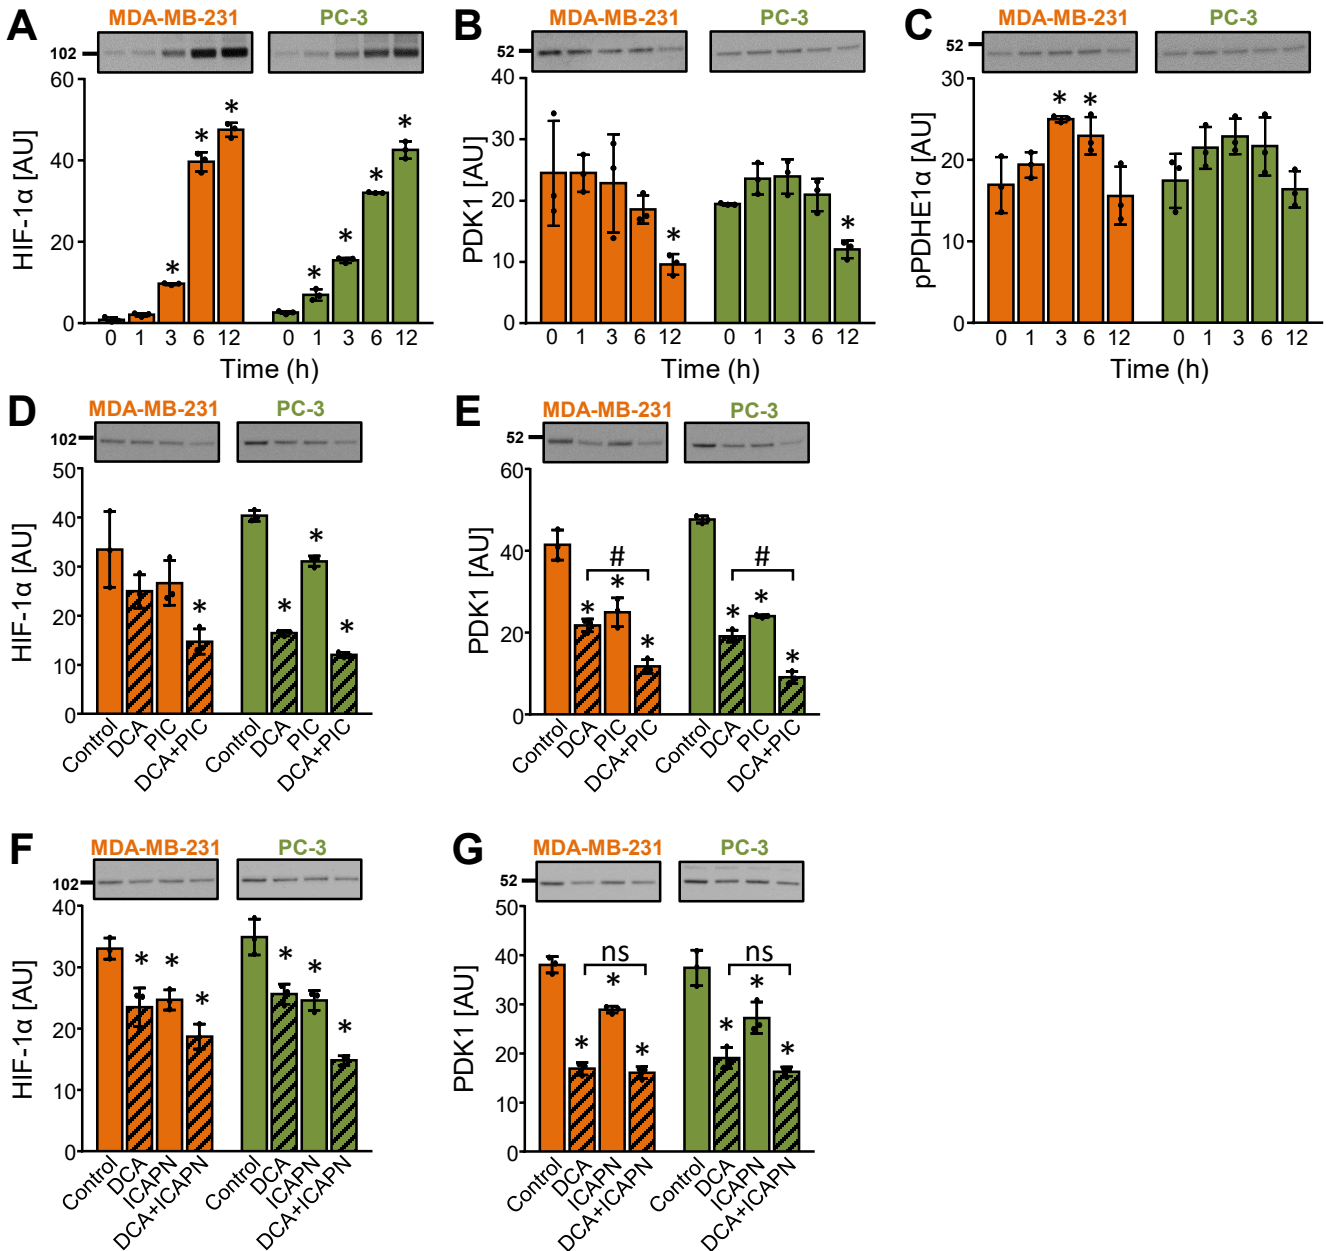

**Supplementary figure S2 (supplementary figure to Figure 6): Inhibition of the proteasome or mitochondrial proteases does not prevent the DCA-induced suppression of PDK1 in cancer cells.**

(A–C) Cells were treated with MG-132 (10  $\mu$ M) for 12 hours in serum-free RPMI medium. (D,E) Cells were treated with DCA (10 mM) and/or the protease inhibitor cocktail (PIC, 1:600) in the RPMI medium without serum (PC-3) or with 10% FBS (MDA-MB-231) for 24 hours. (F,G) Cells were treated with 9  $\mu$ M (MDA-MB-231) or 45  $\mu$ M (PC-3) calpain inhibitor III (ICAPN) in serum-free RPMI medium for 24 hours. DCA was added during the final 14 hours of treatment. The protein levels of HIF-1 $\alpha$ , PDK1, and phospho-PDHE1 $\alpha$ <sup>Ser293</sup> (pPDHE1 $\alpha$ ) were determined with immunoblotting. Numbers next to the blots indicate molecular weight markers in kDa. Results are means  $\pm$  SD of one experiment, performed in triplicate, for each cell line and each condition ( $n = 3$ ). \*  $p < 0.05$  vs. 0 h or Control and #  $p < 0.05$  between selected samples (as indicated).

## Supplementary Figure S3

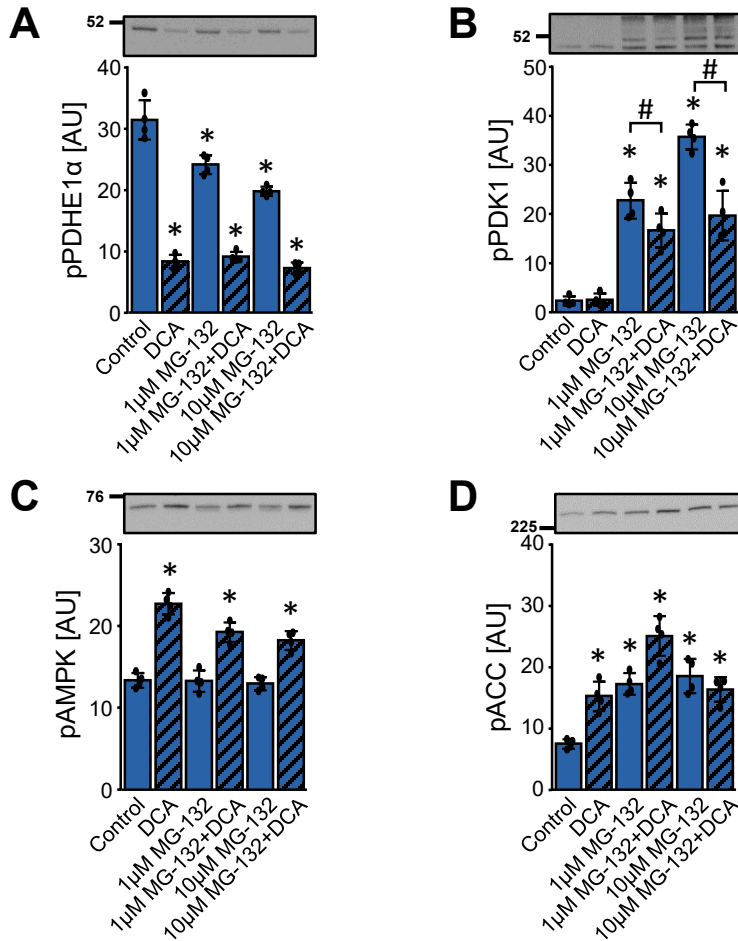

**Supplementary figure S3 (supplementary figure to Figure 7): DCA reduces the abundance of PDK1 and PDK2 in L6 myotubes despite upregulation of HIF-1 $\alpha$  and inhibition of the proteasome.** The differentiated L6 cells (myotubes) were treated with MG-132 (1 or 10  $\mu$ M) for 1 hour, which was followed by a 24-hour treatment with DCA (10 mM) and/or MG-132 (1 or 10  $\mu$ M). Immunoblotting was used to estimate the abundance of (A) phospho-PDHE1 $\alpha$ <sup>Ser293</sup> (pPDHE1 $\alpha$ ), (B) phospho-PDK1<sup>Thr338</sup> (pPDK1), (C) phospho-AMPK $\alpha$ <sup>Thr172</sup> (pAMPK), and (D) phospho-ACC<sup>Ser79</sup> (pACC). Numbers next to the blots indicate molecular weight markers in kDa. Results are means  $\pm$  SD of one experiment in four replicates ( $n = 4$ ). \*  $p < 0.05$  vs. Control and #  $p < 0.05$  between selected samples (as indicated).

## **Supplement S4: Raw images**

Loading and transfer were evaluated by Ponceau S (0.1% (w/v) in 5% (v/v) acetic acid) staining.

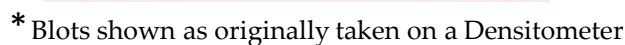

Original uncropped blots presented in Figure 1 (1/2)

Immunoreactive bands were visualized with Fusion FX (Vilber) using enhanced chemiluminescence and quantified using Quantity One 1-D Analysis Software 4.6.8. (Bio-Rad, Hercules, CA, U.S.)

Loading and transfer were evaluated by Ponceau S (0.1% (w/v) in 5% (v/v) acetic acid) staining.

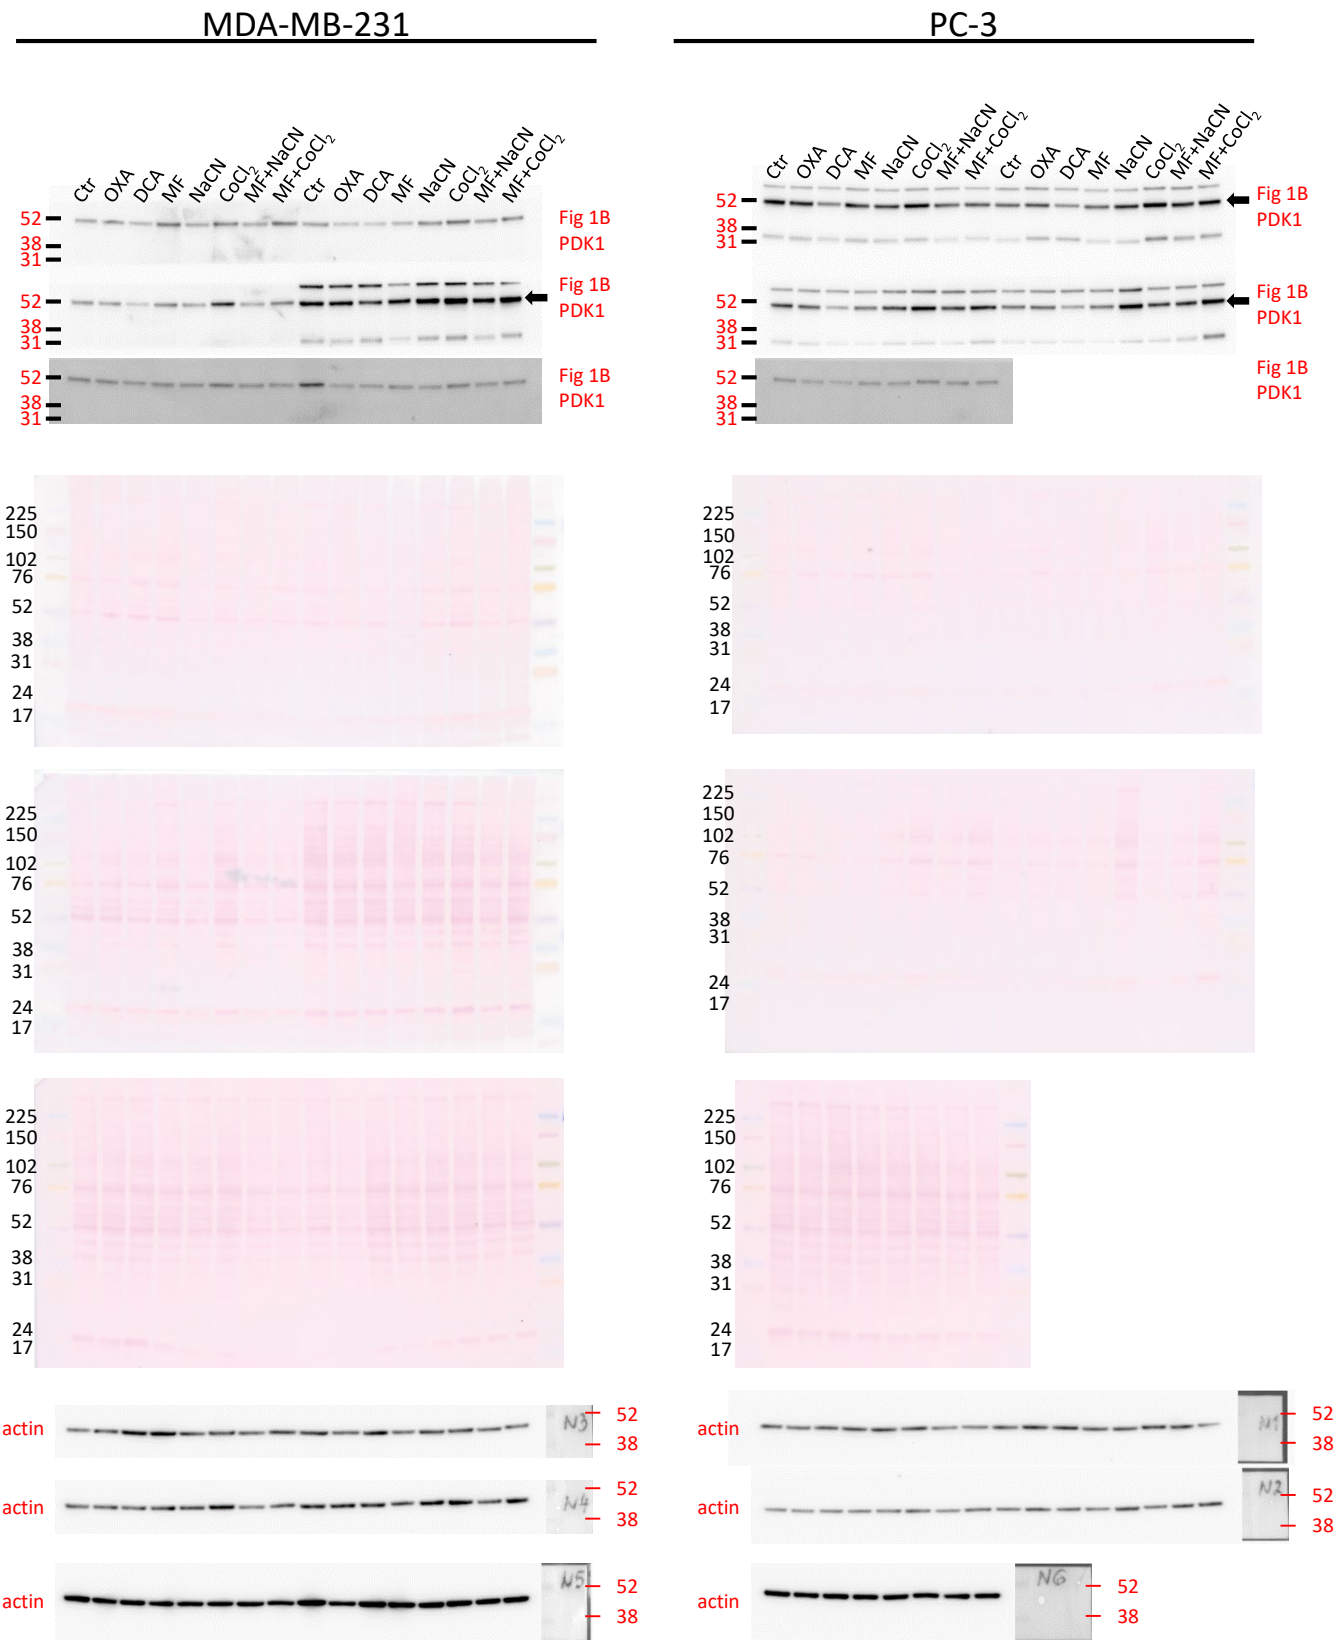

Original uncropped blots presented in Figure 1 (2/2)



Immunoreactive bands were visualized on X-ray films or with Fusion FX (Vilber) using enhanced chemiluminescence and quantified using GS-800 Densitometer and Quantity One 1-D Analysis Software 4.6.8. (Bio-Rad, Hercules, CA, U.S.)

Loading and transfer were evaluated by Ponceau S (0.1% (w/v) in 5% (v/v) acetic acid) staining.

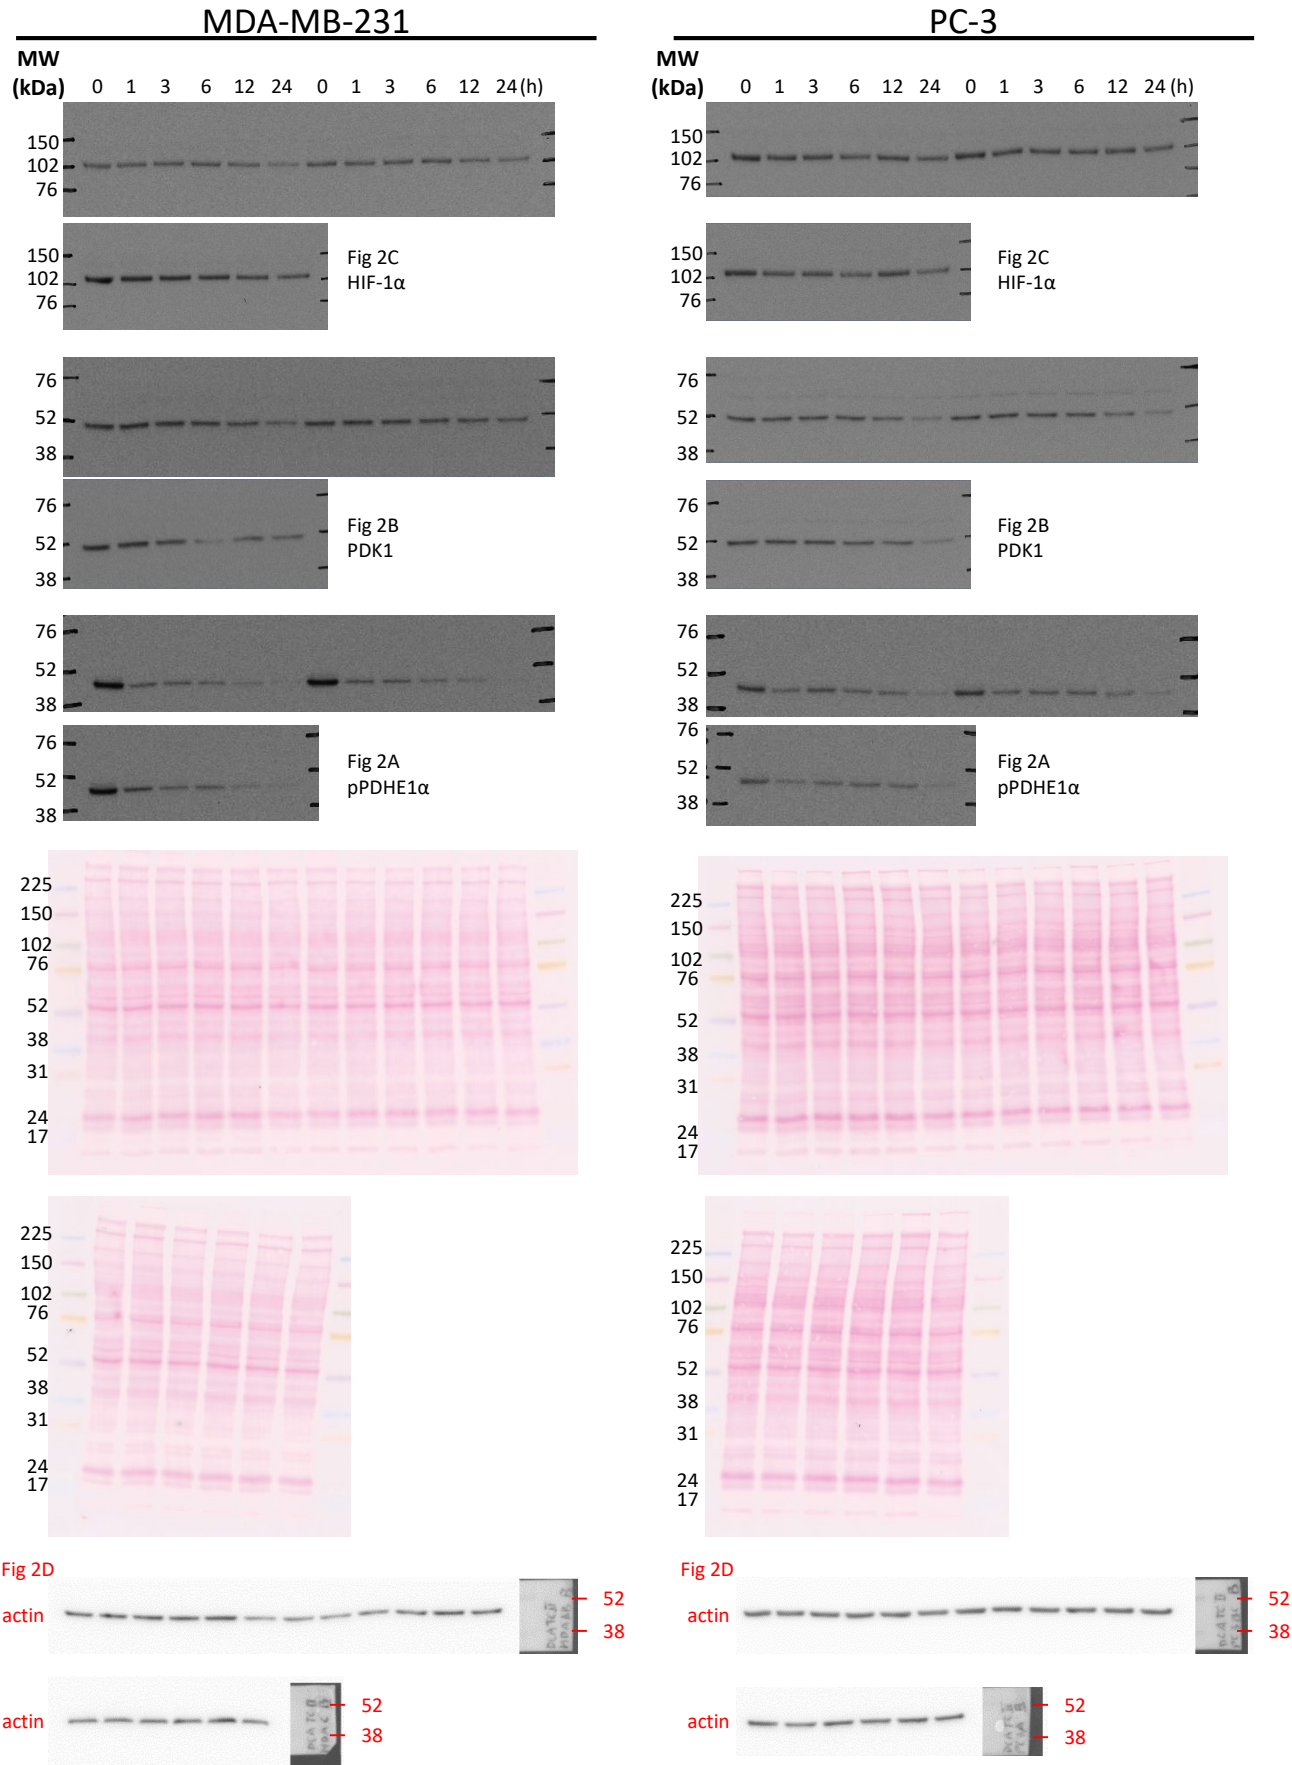

Loading and transfer were evaluated by Ponceau S (0.1% (w/v) in 5% (v/v) acetic acid) staining.

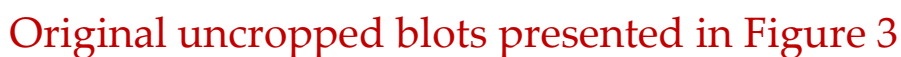

Immunoreactive bands were visualized on X-ray films or with Fusion FX (Vilber) using enhanced chemiluminescence and quantified using GS-800 Densitometer and Quantity One 1-D Analysis Software 4.6.8. (Bio-Rad, Hercules, CA, U.S.)

Loading and transfer were evaluated by Ponceau S (0.1% (w/v) in 5% (v/v) acetic acid) staining.

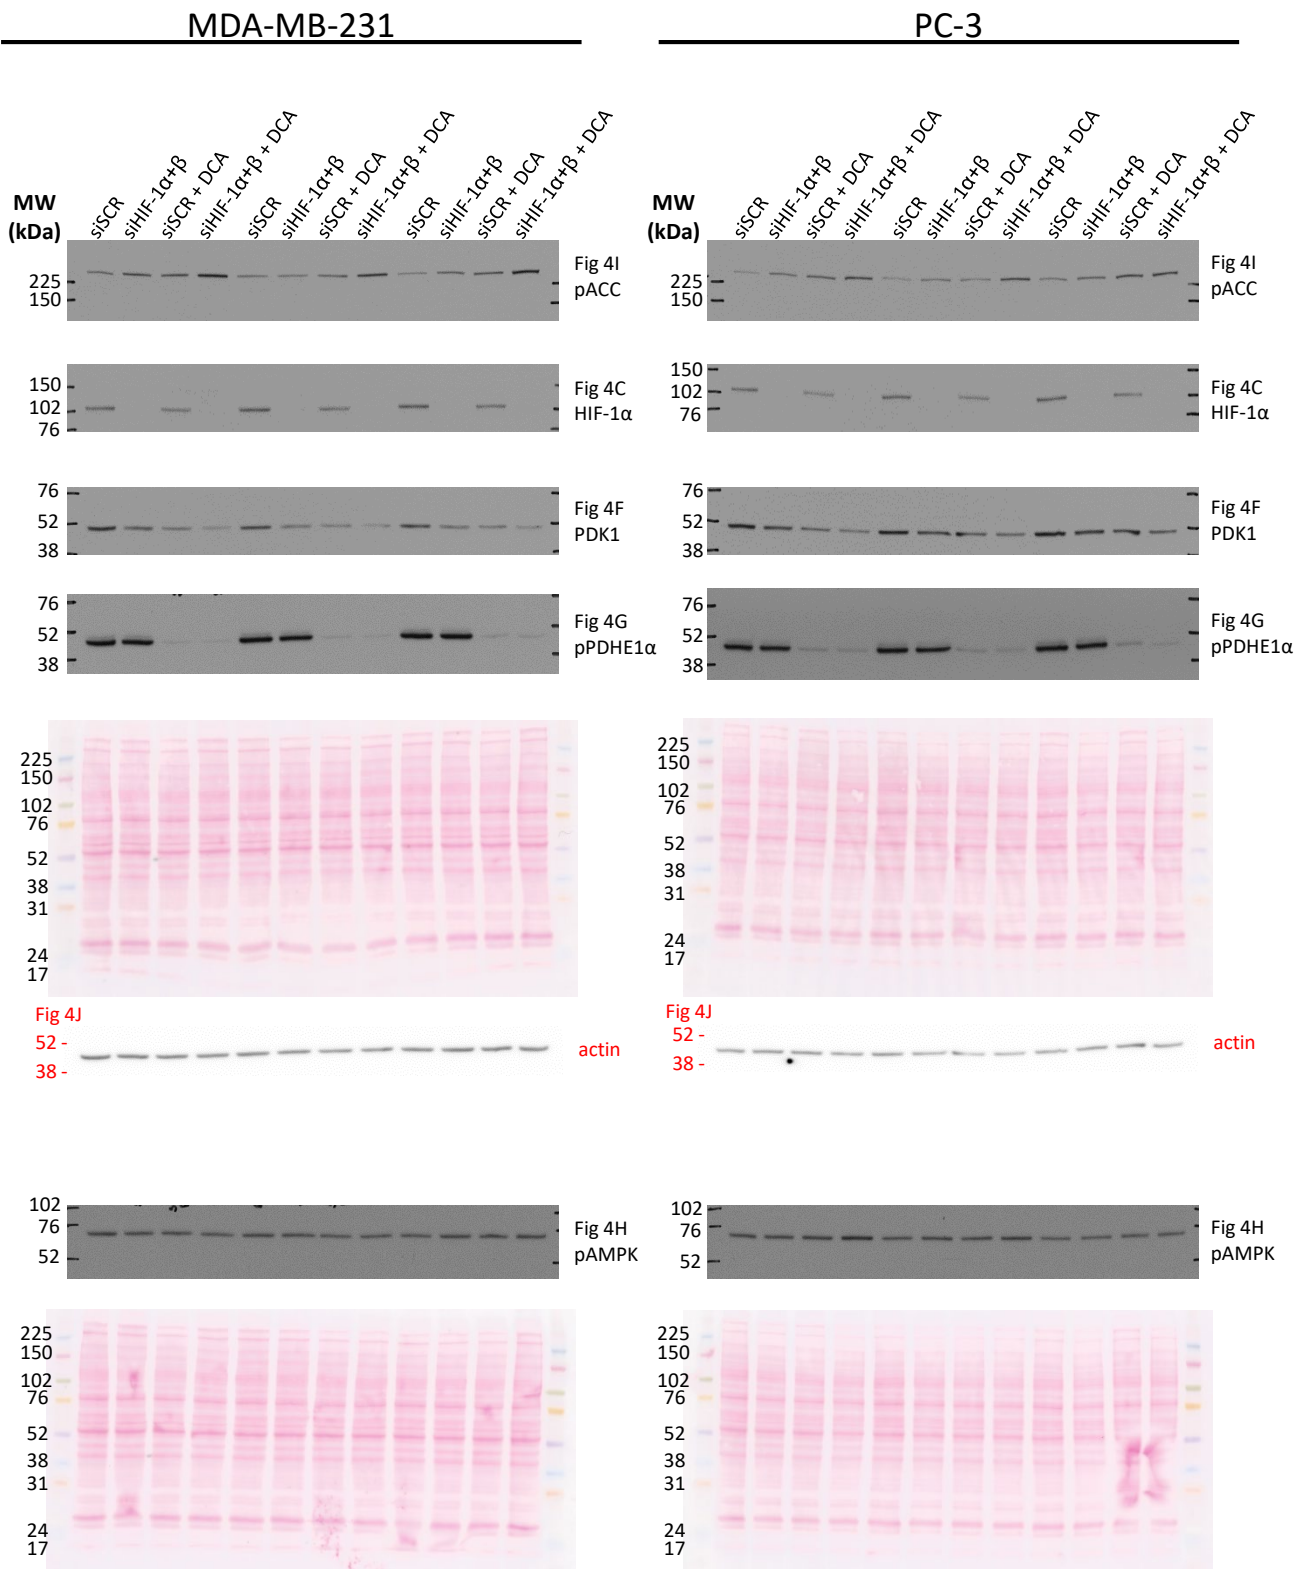

Original uncropped blots presented in Figure 4





Immunoreactive bands were visualized on X-ray films using enhanced chemiluminescence and quantified using GS-800 Densitometer and Quantity One 1-D Analysis Software 4.6.8. (Bio-Rad, Hercules, CA, U.S.)

Loading and transfer were evaluated by Ponceau S (0.1% (w/v) in 5% (v/v) acetic acid) staining.

PC-3

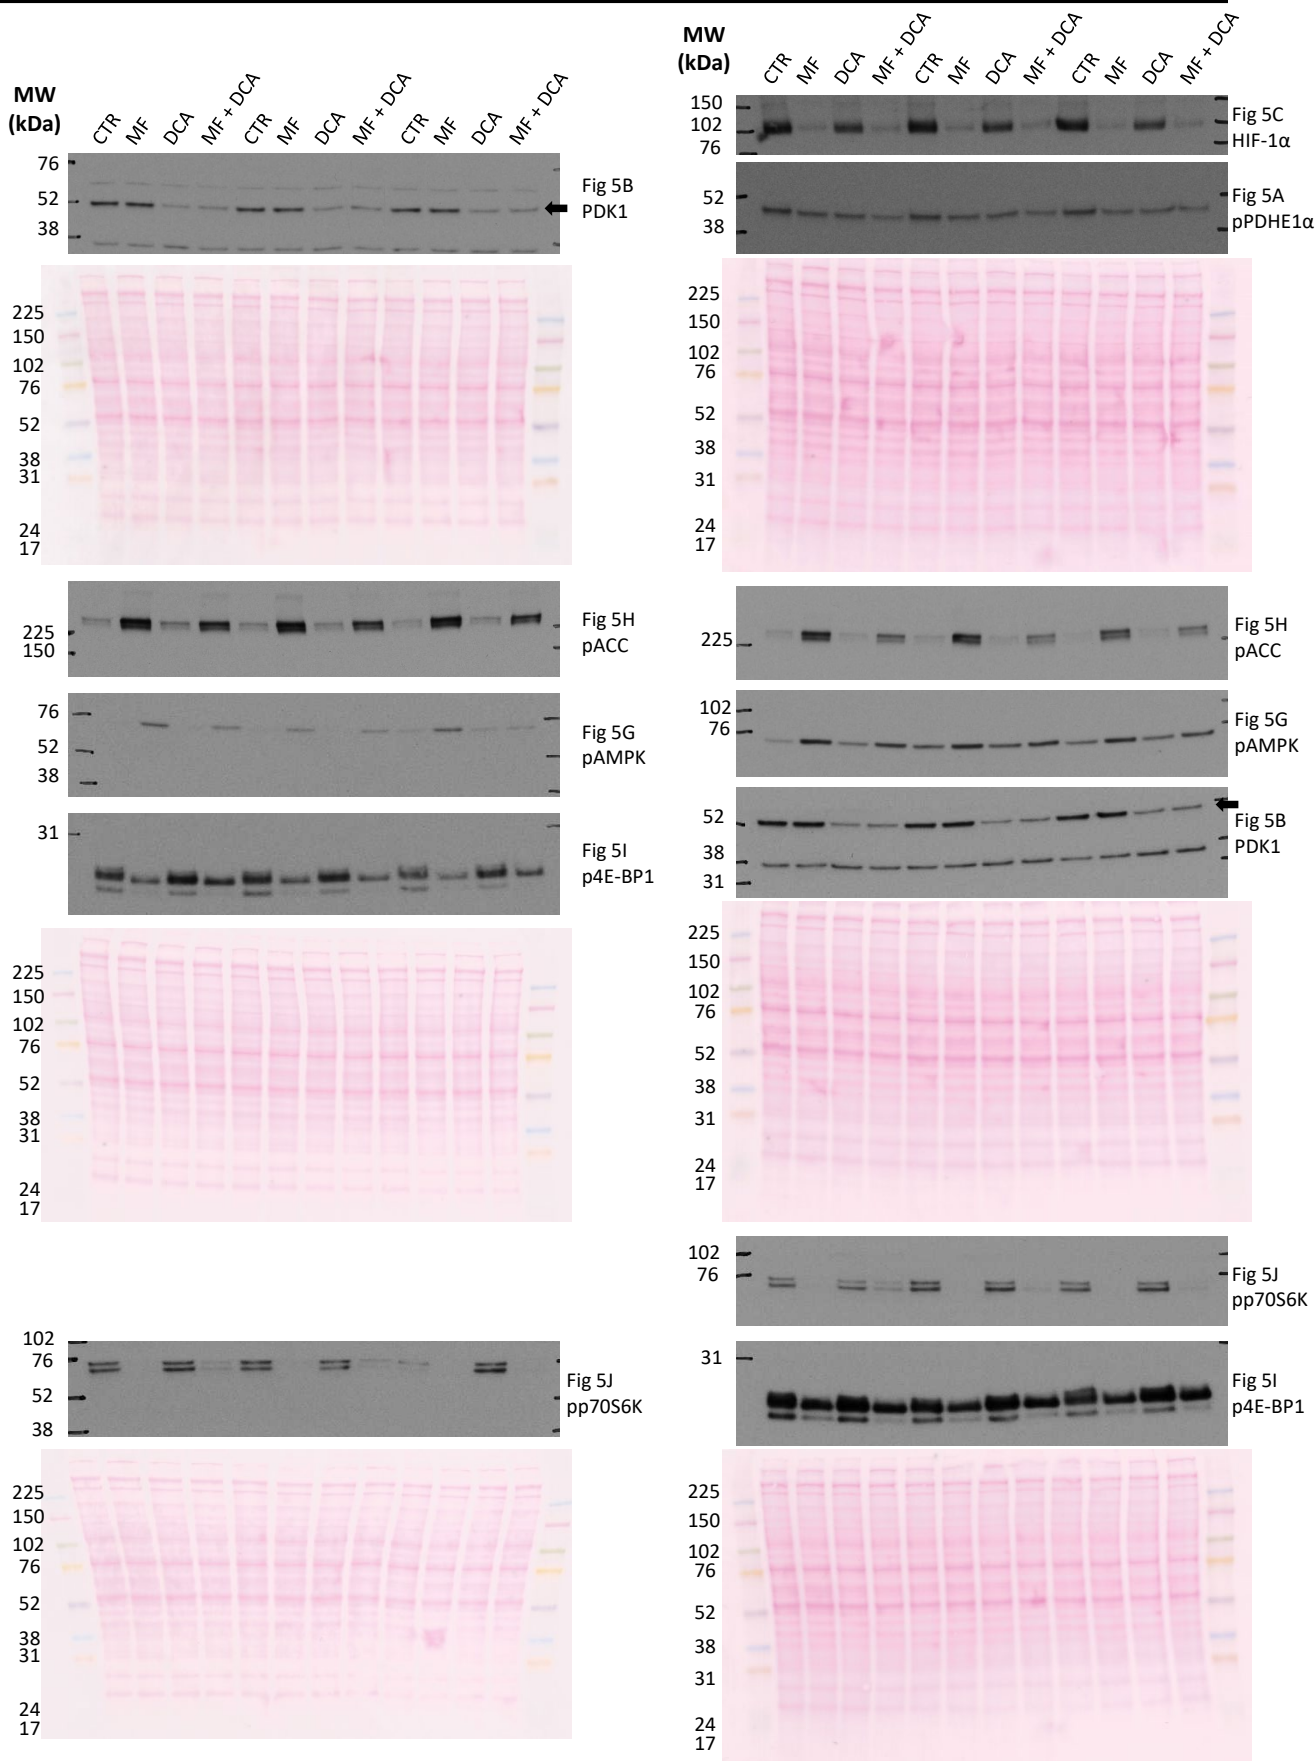

Original uncropped blots presented in Figure 5 (2/2)

Immunoreactive bands were visualized on X-ray films using enhanced chemiluminescence and quantified using GS-800 Densitometer and Quantity One 1-D Analysis Software 4.6.8. (Bio-Rad, Hercules, CA, U.S.)

Loading and transfer were evaluated by Ponceau S (0.1% (w/v) in 5% (v/v) acetic acid) staining.

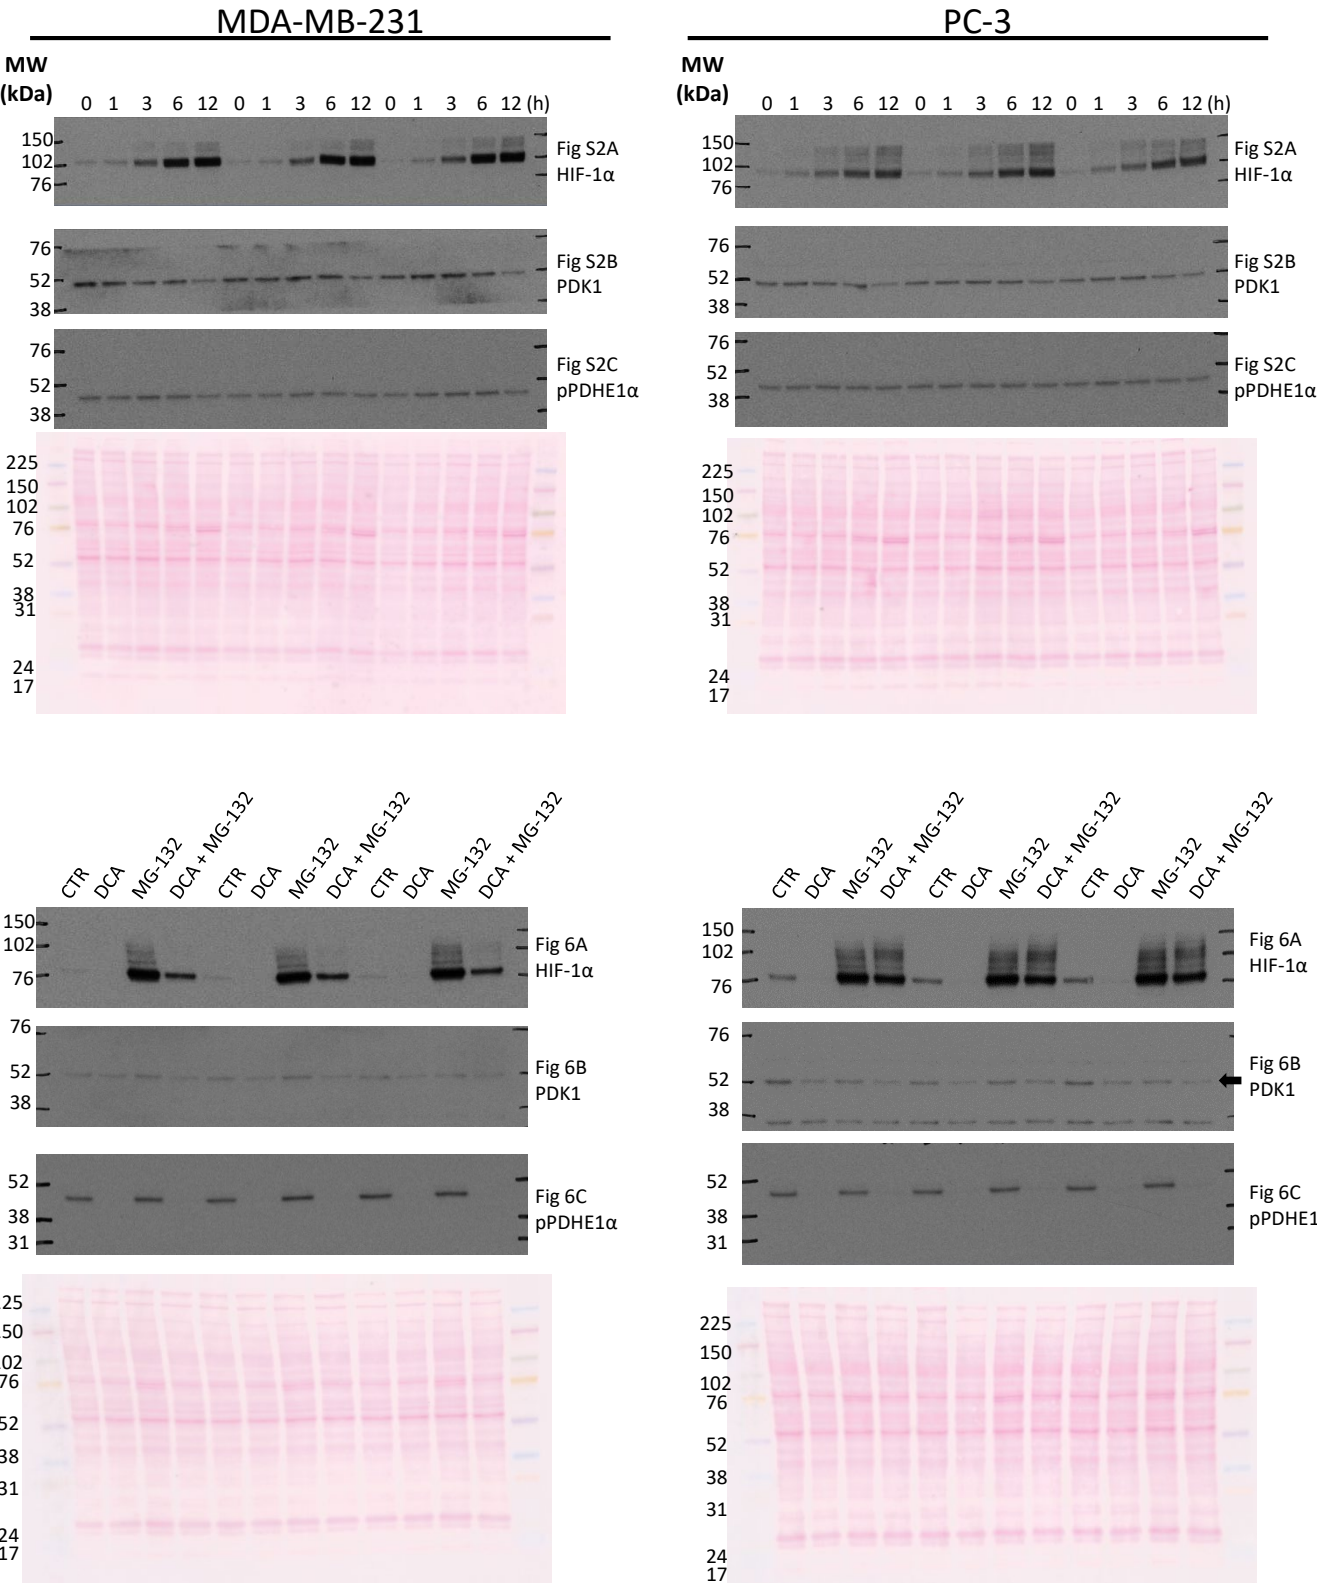

Original uncropped blots presented in Figure 6 and S2 (1/3)



Immunoreactive bands were visualized on X-ray films using enhanced chemiluminescence and quantified using GS-800 Densitometer and Quantity One 1-D Analysis Software 4.6.8. (Bio-Rad, Hercules, CA, U.S.)

Loading and transfer were evaluated by Ponceau S (0.1% (w/v) in 5% (v/v) acetic acid) staining.

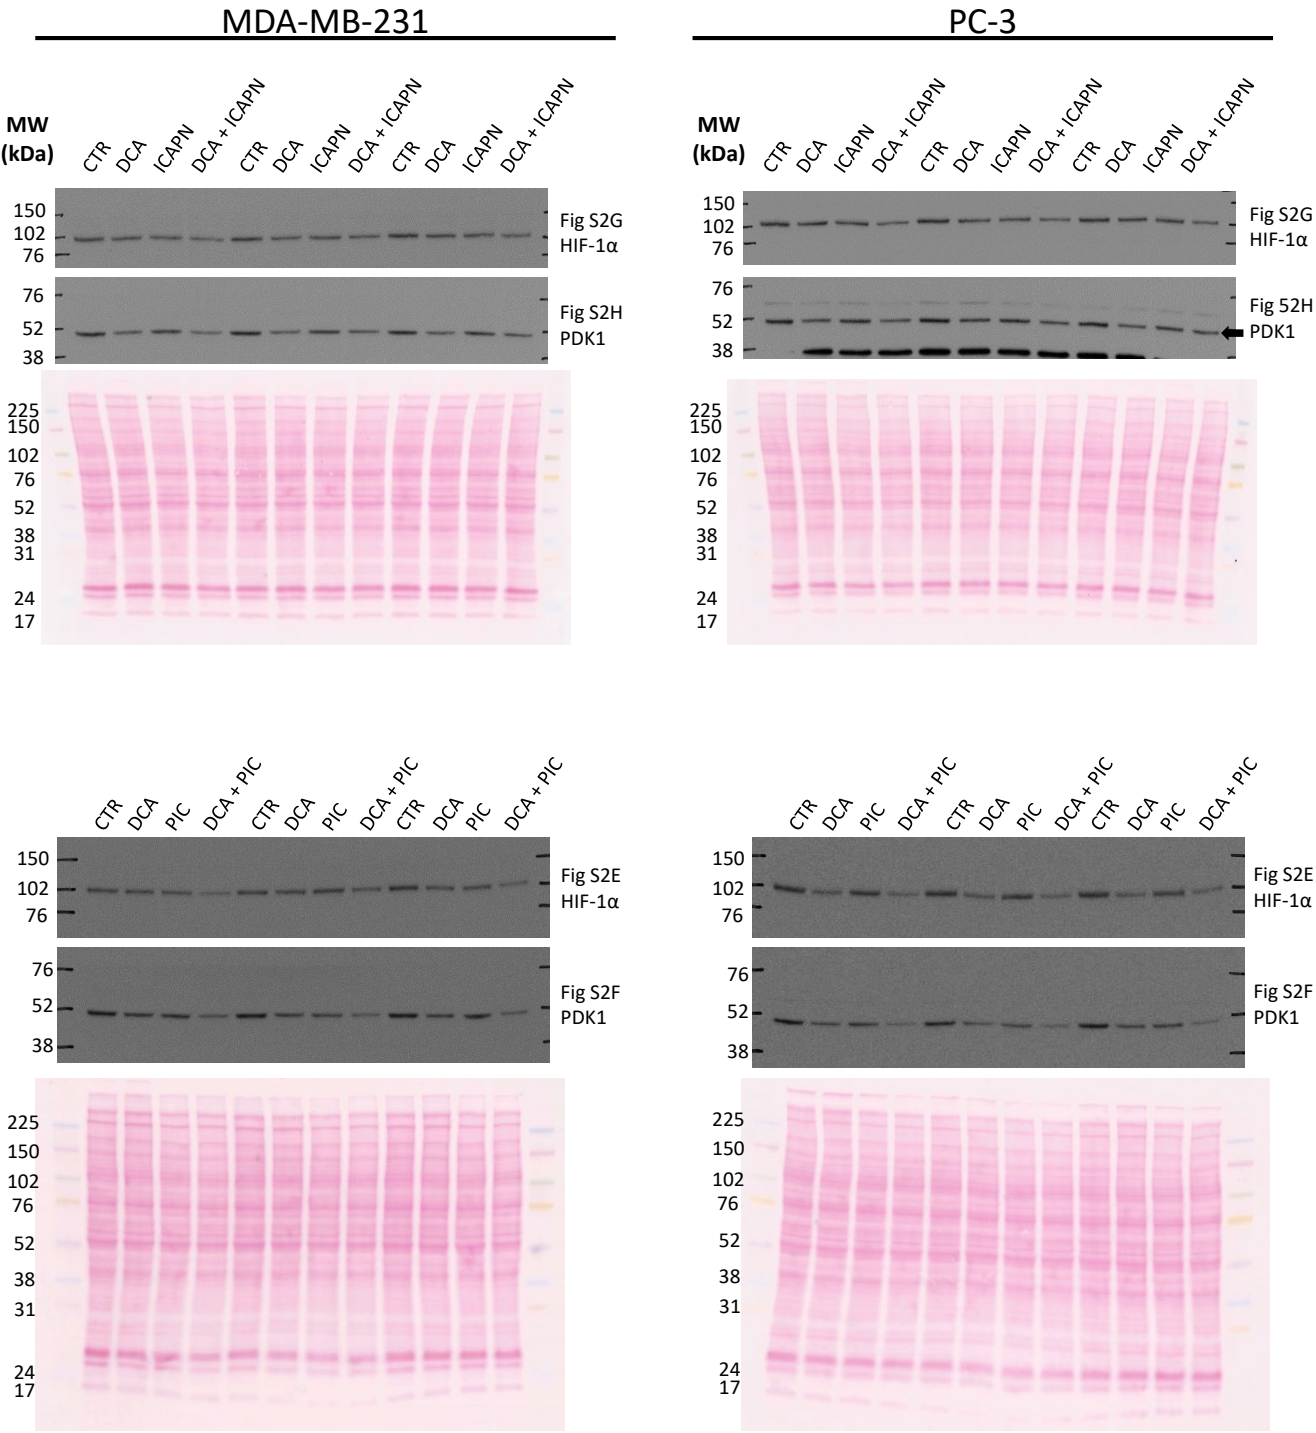

Immunoreactive bands were visualized on X-ray films or with Fusion FX (Vilber) using enhanced chemiluminescence and quantified using GS-800 Densitometer and Quantity One 1-D Analysis Software 4.6.8. (Bio-Rad, Hercules, CA, U.S.)

Loading and transfer were evaluated by Ponceau S (0.1% (w/v) in 5% (v/v) acetic acid) staining.

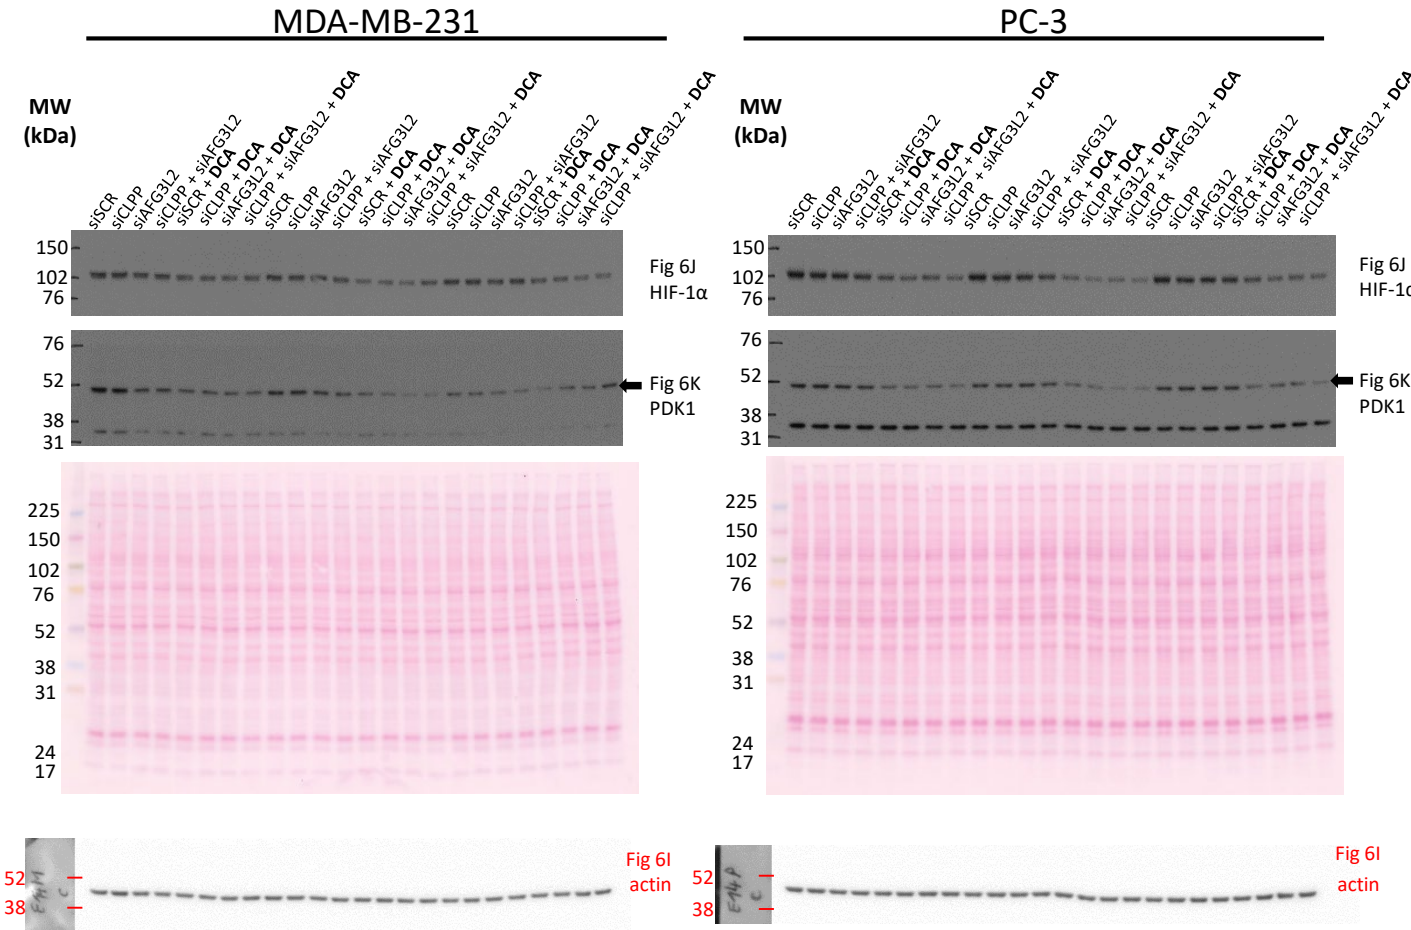



Immunoreactive bands were visualized on X-ray films or with Fusion FX (Vilber) using enhanced chemiluminescence and quantified using GS-800 Densitometer and Quantity One 1-D Analysis Software 4.6.8. (Bio-Rad, Hercules, CA, U.S.)

Loading and transfer were evaluated by Ponceau S (0.1% (w/v) in 5% (v/v) acetic acid) staining.

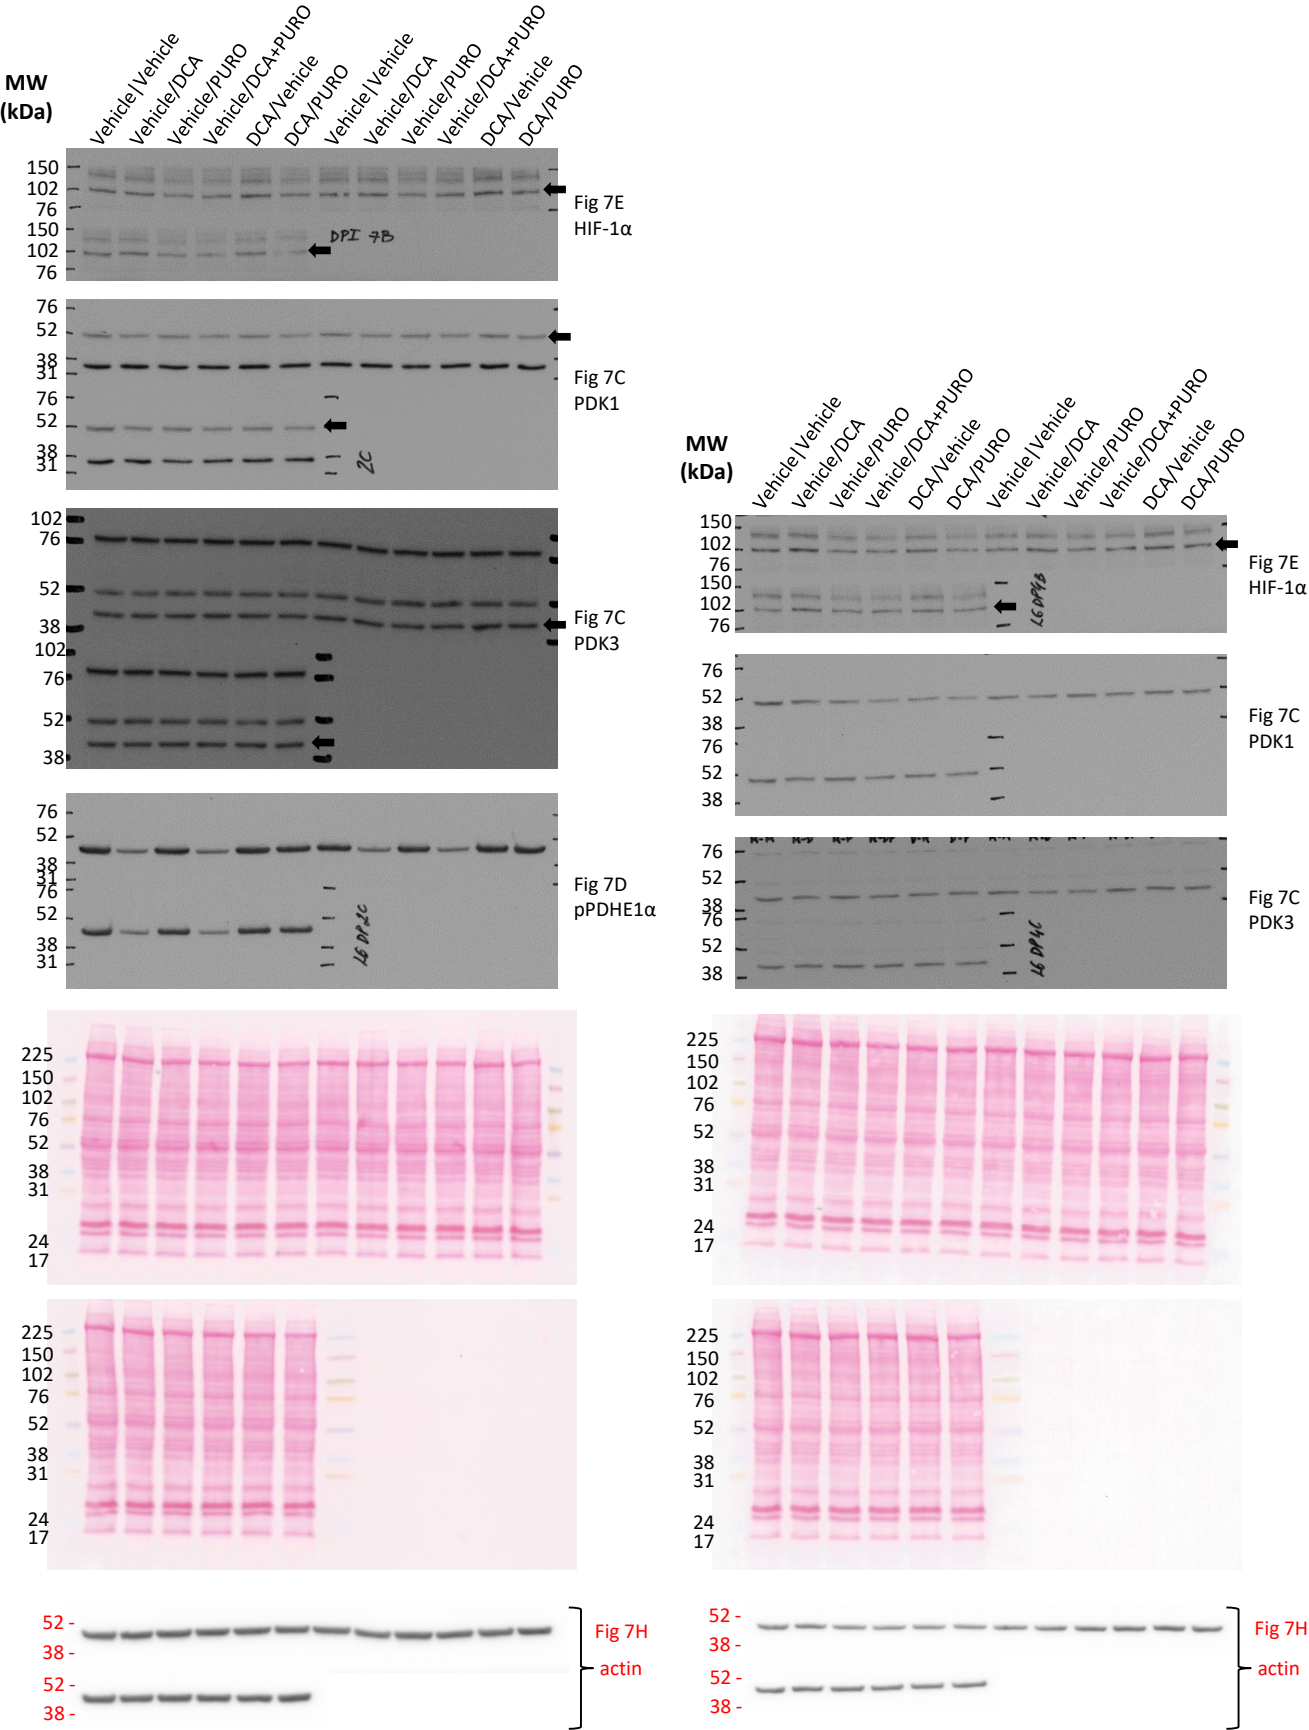

Original uncropped blots presented in Figure 7 and S3 (1/4)

Immunoreactive bands were visualized on X-ray films using enhanced chemiluminescence and quantified using GS-800 Densitometer and Quantity One 1-D Analysis Software 4.6.8. (Bio-Rad, Hercules, CA, U.S.)

Loading and transfer were evaluated by Ponceau S (0.1% (w/v) in 5% (v/v) acetic acid) staining.

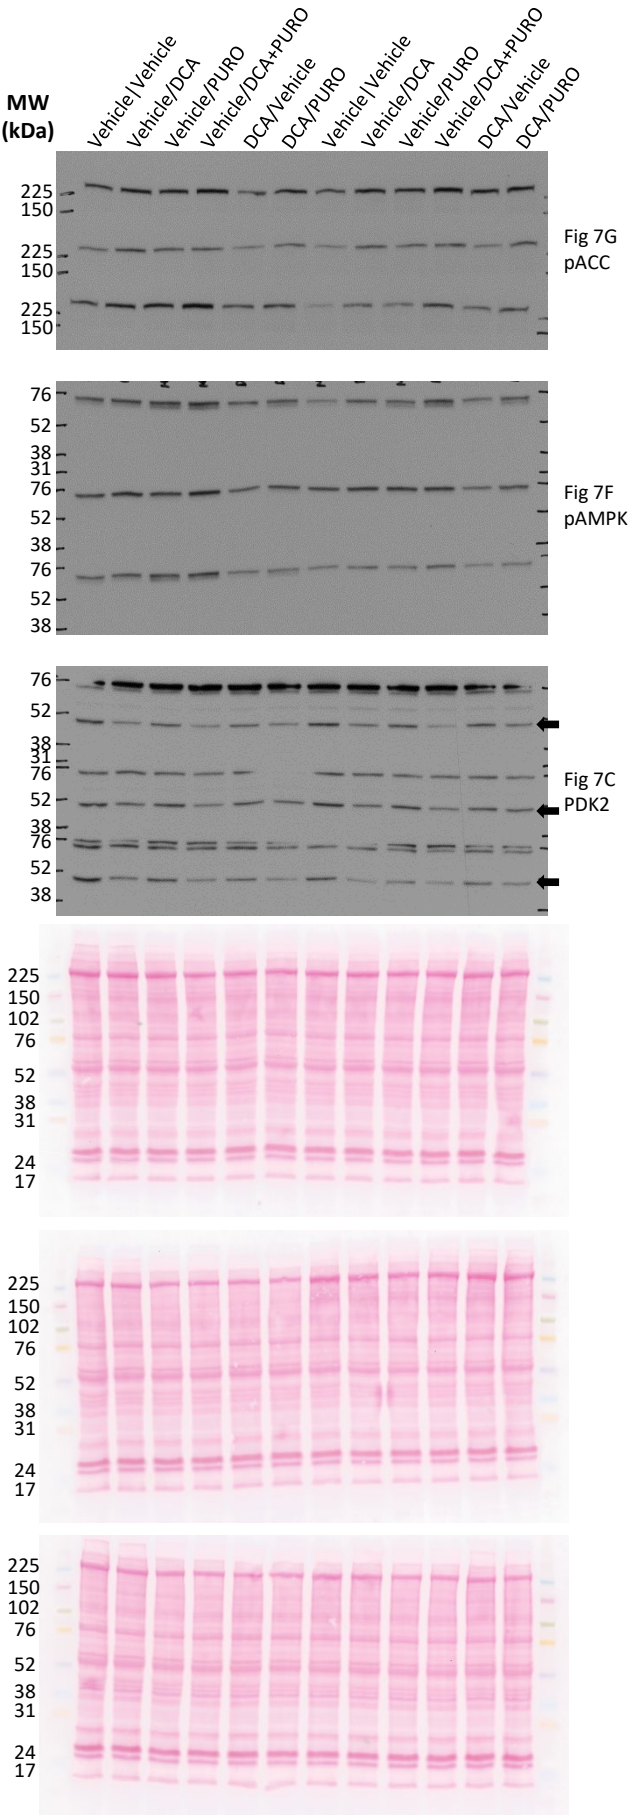

Original uncropped blots presented in Figure 7 and S3 (2/4)

Immunoreactive bands were visualized on X-ray films using enhanced chemiluminescence and quantified using GS-800 Densitometer and Quantity One 1-D Analysis Software 4.6.8. (Bio-Rad, Hercules, CA, U.S.)

Loading and transfer were evaluated by Ponceau S (0.1% (w/v) in 5% (v/v) acetic acid) staining.

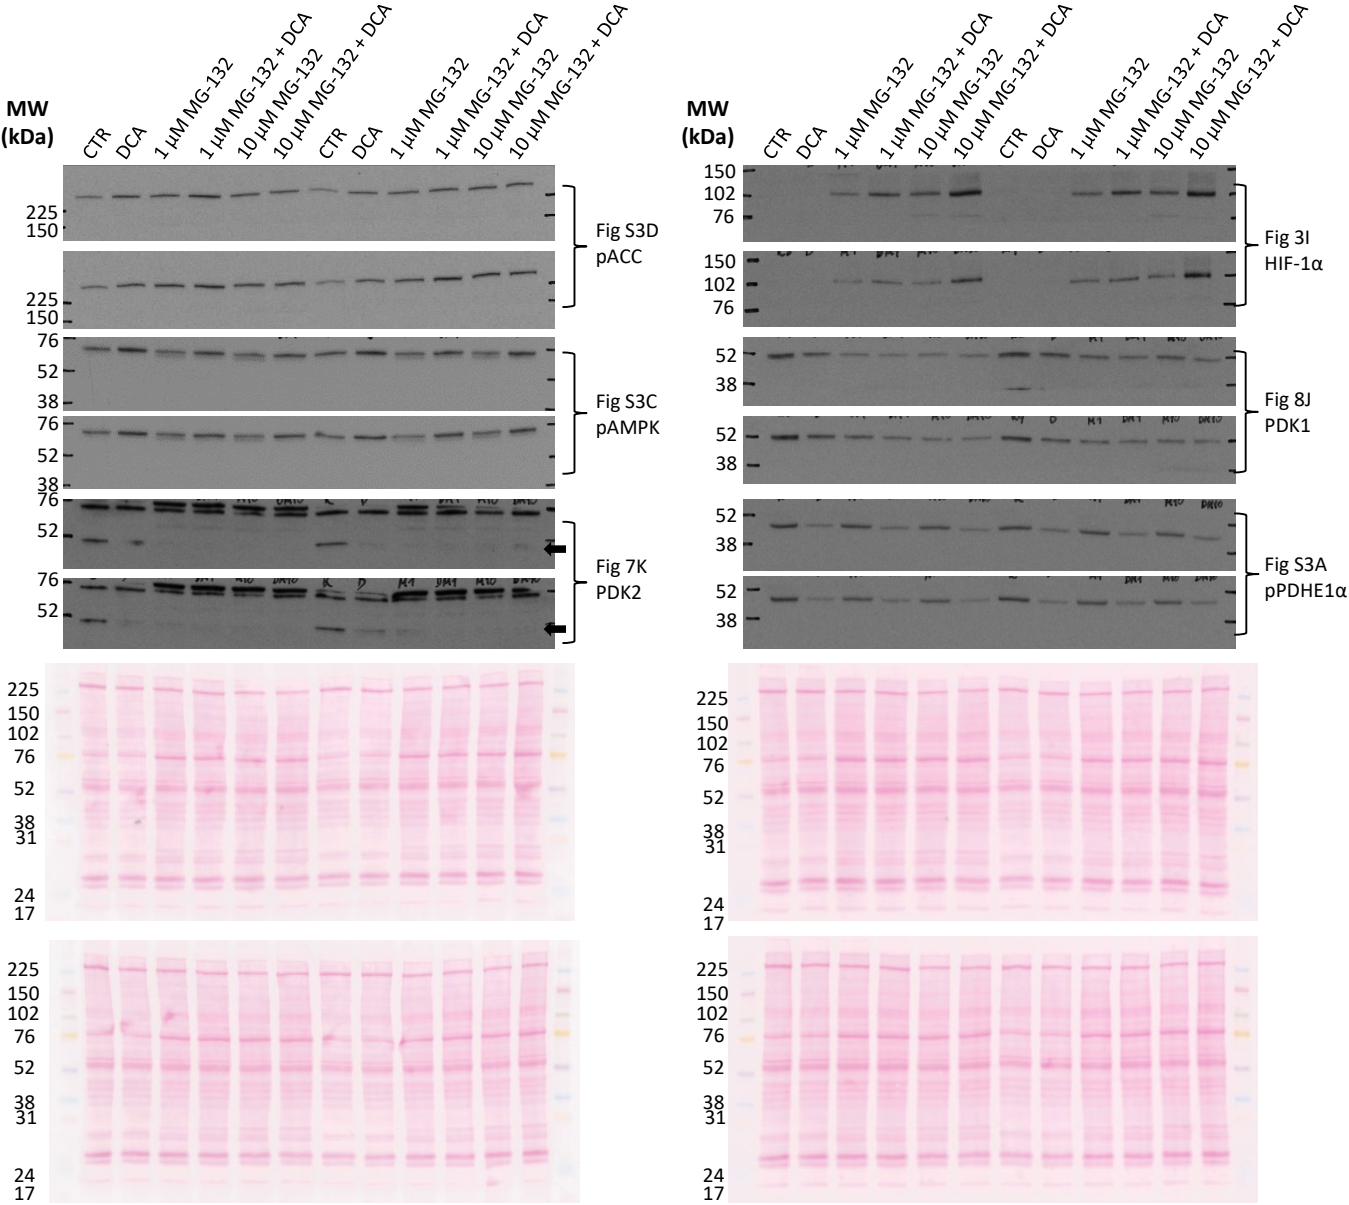

Immunoreactive bands were visualized on X-ray films or with Fusion FX (Vilber) using enhanced chemiluminescence and quantified using GS-800 Densitometer and Quantity One 1-D Analysis Software 4.6.8. (Bio-Rad, Hercules, CA, U.S.)

Loading and transfer were evaluated by Ponceau S (0.1% (w/v) in 5% (v/v) acetic acid) staining.

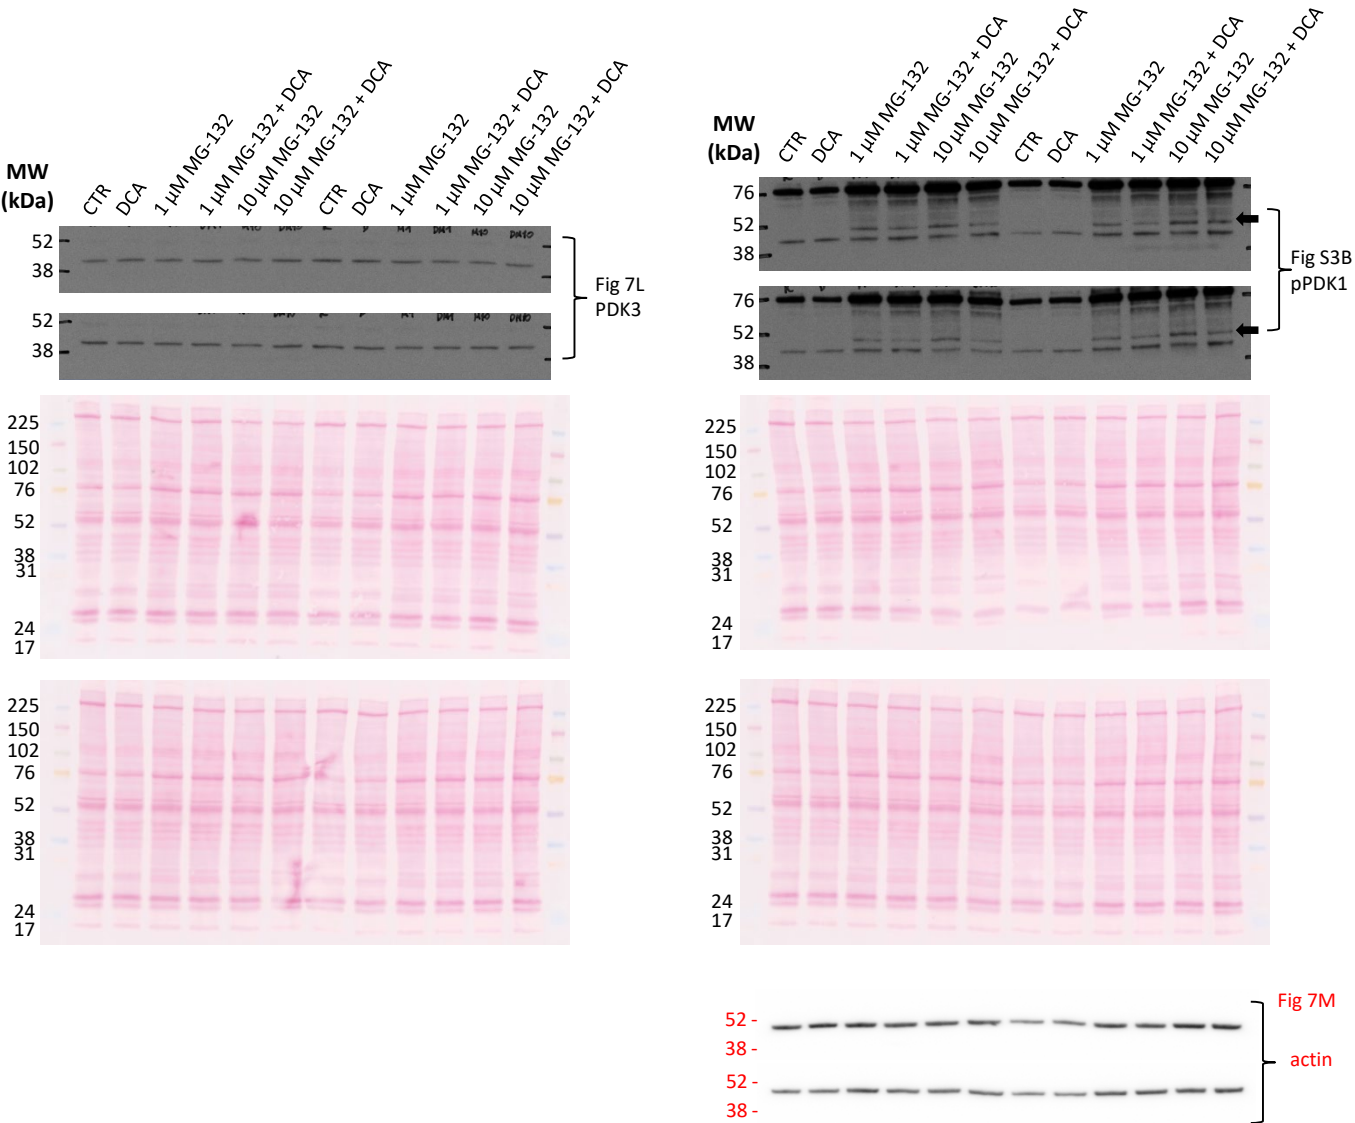

Supplement: s1 [file s1]
